# Supplementary material for: Effects of arsenic on the topology and solubility of promyelocytic leukemia (PML)-nuclear bodies
Source: PLoS One. 2022 May 20;17(5):e0268835. doi: 10.1371/journal.pone.0268835 (PMC9122205; doi:10.1371/journal.pone.0268835)
Supplement: S1 Data — (XLSX) [file pone.0268835.s007.xlsx]

## Sheet: Fig.1
Untreated CHOGFPPML cells					As3+-exposed CHOGFPPML cells					Untreated HEKGFPPML cells					As3+-exposed HEKGFPPML cells
No of PMLNBs	Average size (μm)	SD	SEM		No of PMLNBs	Average size (μm)	SD	SEM		No of PMLNBs	Average size (μm)	SD	SEM		No of PMLNBs	average size (μm)	SD	SEM
22	0.53	0.09	0.0191881		11	0.66	0.16	0.0482418		17	0.45	0.13	0.0315296		10	0.69	0.12	0.0379473
10	0.42	0.07	0.0221359		16	0.45	0.11	0.0275		7	0.41	0.08	0.0302372		17	0.45	0.13	0.0315296
24	0.71	0.12	0.0244949		16	0.53	0.13	0.0325		9	1.01	0.36	0.12		11	0.53	0.08	0.0241209
8	1.06	0.14	0.0494975		7	0.97	0.07	0.0264575		14	0.42	0.11	0.0293987		7	0.87	0.2	0.0755929
13	0.58	0.16	0.044376		6	1.03	0.21	0.0857321		24	0.47	0.14	0.0285774		16	0.49	0.08	0.02
6	1.19	0.3	0.122474		25	0.39	0.08	0.016		10	0.46	0.1	0.0316228		17	0.41	0.12	0.0291043
16	0.44	0.1	0.025		8	0.96	0.13	0.0459619		23	0.35	0.1	0.0208514		12	0.5	0.11	0.0317543
10	0.83	0.21	0.0664078		11	0.5	0.11	0.0331662		20	0.47	0.12	0.0268328		18	0.44	0.13	0.0306413
21	0.55	0.13	0.0283683		17	0.41	0.09	0.0218282		21	0.5	0.11	0.024004		12	0.41	0.09	0.0259808
9	0.84	0.18	0.06		21	0.47	0.14	0.0305505		17	0.47	0.13	0.0315296		17	0.47	0.09	0.0218282
13	0.54	0.2	0.05547		7	0.89	0.18	0.0680336		11	0.57	0.17	0.0512569		17	0.4	0.08	0.0194029
7	0.59	0.12	0.0453557		9	0.57	0.11	0.0366667		24	0.48	0.12	0.0244949		11	0.7	0.2	0.0603023
22	0.41	0.09	0.0191881		10	0.46	0.11	0.0347851		9	0.66	0.15	0.05		25	0.43	0.08	0.016
4	1	0.24	0.12		11	0.52	0.13	0.0391965		10	0.34	0.05	0.0158114		6	0.57	0.05	0.0204124
10	0.51	0.07	0.0221359		13	0.42	0.09	0.0249615		10	0.46	0.09	0.0284605		27	0.47	0.13	0.0250185
16	0.48	0.18	0.045		24	0.4728	0.13449	0.0274527		8	0.65	0.16	0.0565685		7	0.5	0.1	0.0377964
14	0.48	0.12	0.0320713		8	0.55	0.1	0.0353553		14	0.47	0.09	0.0240535		14	0.38	0.11	0.0293987
14	0.39	0.09	0.0240535		12	0.6	0.11	0.0317543		10	0.49	0.06	0.0189737		12	0.7	0.14	0.0404145
18	0.53	0.08	0.0188562		8	0.48	0.12	0.0424264		9	0.61	0.16	0.0533333		26	0.41	0.11	0.0215728
12	0.35	0.13	0.0375278		7	0.76	0.21	0.0793725		9	0.66	0.14	0.0466667		7	0.55	0.11	0.0415761
26	0.35	0.12	0.0235339		22	0.38	0.07	0.0149241		12	0.45	0.14	0.0404145		20	0.46	0.1	0.0223607
10	0.41	0.1	0.0316228		8	0.78	0.18	0.0636396		13	0.55	0.14	0.038829		17	0.46	0.08	0.0194029
12	0.6	0.14	0.0404145		8	0.67	0.08	0.0282843		12	0.51	0.12	0.034641		11	0.51	0.1	0.0301511
13	0.49	0.15	0.0416025		21	0.43	0.11	0.024004		11	0.8	0.16	0.0482418		10	0.55	0.17	0.0537587
19	0.46	0.1	0.0229416		14	0.54	0.11	0.0293987		18	0.51	0.13	0.0306413		12	0.55	0.11	0.0317543
14	0.46	0.09	0.0240535		10	0.57	0.17	0.0537587		11	0.49	0.08	0.0241209		7	0.85	0.2	0.0755929
20	0.42	0.09	0.0201246		15	0.45	0.12	0.0309839		24	0.43	0.1	0.0204124		10	0.63	0.08	0.0252982
15	0.61	0.21	0.0542218		21	0.45	0.09	0.0196396		9	1.06	0.27	0.09		11	0.61	0.16	0.0482418
20	0.72	0.28	0.0626099		10	0.84	0.11	0.0347851		20	0.42	0.08	0.0178885		19	0.42	0.11	0.0252357
12	0.63	0.17	0.0490748		15	0.43	0.07	0.0180739		27	0.46	0.12	0.023094		10	0.48	0.12	0.0379473
8	0.64	0.16	0.0565685		7	1.05	0.25	0.0944911		15	0.41	0.08	0.0206559		8	0.75	0.19	0.0671751
11	0.39	0.09	0.027136		14	0.44	0.05	0.0133631		8	0.58	0.16	0.0565685		9	0.66	0.16	0.0533333
12	0.62	0.14	0.0404145		18	0.48	0.11	0.0259272		16	0.39	0.15	0.0375		11	0.53	0.15	0.0452267
8	0.96	0.32	0.113137		14	0.72	0.15	0.0400892		12	0.63	0.14	0.0404145		15	0.55	0.14	0.0361478
13	0.43	0.1	0.027735		20	0.5	0.09	0.0201246		8	0.53	0.11	0.0388909		11	0.59	0.11	0.0331662
18	0.43	0.1	0.0235702		11	0.67	0.13	0.0391965		10	0.7	0.22	0.0695701		9	0.6	0.16	0.0533333
16	0.48	0.15	0.0375		8	0.83	0.18	0.0636396		13	0.47	0.12	0.033282		18	0.53	0.13	0.0306413
9	0.52	0.1	0.0333333		14	0.4	0.11	0.0293987		12	0.55	0.1	0.0288675		15	0.44	0.09	0.0232379
7	0.84	0.23	0.0869318		11	0.62	0.15	0.0452267		22	0.5	0.13	0.0277161		17	0.56	0.13	0.0315296
13	0.53	0.1	0.027735		9	0.79	0.12	0.04		19	0.39	0.09	0.0206474		18	0.48	0.13	0.0306413

## Sheet: Fig. 3A
	Blank corrected raw data (A450) Absorbance								Cell viability (% of control)
	As μM	0	10	30	100	150			As μM	0	10	30	100	150
		0.285	0.325	0.268	0.117	0.08				109.721	125.12	103.176	45.0433	30.7988
		0.255	0.366	0.291	0.16	0.09				98.1713	140.905	112.031	61.5977	34.6487
		0.245	0.319	0.28	0.11	0.1				94.3215	122.81	107.796	42.3484	38.4986
		0.254	0.321	0.242	0.1	0.078				97.7863	123.58	93.1665	38.4986	30.0289
									Ave	100	128.104	104.042	46.872	33.4937
									SEM	3.35393	4.29385	4.05112	5.08894	1.95042
	Sb μM	0	10	30	100	150			Sb μM	0	10	30	100	150
		0.285	0.351	0.357	0.252	0.028				109.721	135.13	137.44	97.0164	10.7796
		0.255	0.357	0.386	0.247	0.039				98.1713	137.44	148.604	95.0914	15.0144
		0.245	0.345	0.369	0.271	0.065				94.3215	132.82	142.06	104.331	25.0241
		0.254	0.355	0.374	0.252	0.041				97.7863	136.67	143.985	97.0164	15.7844
									Ave	100	135.515	143.022	98.3638	16.6506
									SEM	3.35393	1.01858	2.31259	2.04018	3.00015
	Bi μM	0	10	30	100	150			Bi μM	0	10	30	100	150
		0.285	0.249	0.344	0.251	0.181				109.721	95.8614	132.435	96.6314	69.6824
		0.255	0.327	0.376	0.256	0.183				98.1713	125.89	144.755	98.5563	70.4524
		0.245	0.318	0.372	0.255	0.187				94.3215	122.425	143.215	98.1713	71.9923
		0.254	0.263	0.307	0.25	0.197				97.7863	101.251	118.191	96.2464	75.8421
									Ave	100	111.357	134.649	97.4013	71.9923
									SEM	3.35393	7.50537	6.13239	0.566683	1.37017

## Sheet: Fig. 5A
Agglomerated PML-NBs
		<5	>=5	>=5 (%)
	2h
	Untreted	308	2	0.645161
	As	303	5	1.62338
	Sb	338	7	2.02899
	Bi	326	2	0.609756
	4h
	Untreted	315	1	0.316456
	As	284	14	4.69799
	Sb	317	17	5.08982
	Bi	341	0	0
	8h
	Untreted	321	4	1.23077
	As	312	32	9.30233
	Sb	305	34	10.0295
	Bi	351	4	1.12676
	16h
	Untreted	324	2	0.613497
	As	252	64	20.2532
	Sb	313	39	11.0795
	Bi	332	3	0.895522
	24h
	Untreted	339	0	0
	As	216	80	27.027
	Sb	285	49	14.6707
	Bi	292	1	0.341297
	Recovery 8h
	Untreted	377	2	0.527704
	As	302	38	11.1765
	Sb	377	32	7.82396
	Bi	387	3	0.769231
	Recovery 16h
	Untreted	387	3	0.769231
	As	315	13	3.96341
	Sb	351	6	1.68067
	Bi	383	2	0.519481

## Sheet: Fig. 8(A)
	CHOGFPPML
	Control 24h (1 pixel >>> 0.0252 μm2)					TAK243 4h (1 pixel >>> 0.0252 μm2)					ML792 4h (1 pixel >>> 0.0252 μm2)					ML792 24h (1 pixel >>> 0.0252 μm2)
	Slice	Count	Total Area (Pixel)	Ave Size (Pixel)		Slice	Count	Total Area (Pixel)	Ave Size (Pixel)		Slice	Count	Total Area (Pixel)	Ave Size (Pixel)		Slice	Count	Total Area (Pixel)	Ave Size (Pixel)
	dmso24h001.tif	11	345	31.364		tak4h001.tif	11	555	50.455		ml4h001.tif	6	711	118.5		ml24h001.tif	4	142	35.5
	dmso24h001.tif	8	475	59.375		tak4h001.tif	11	619	56.273		ml4h001.tif	8	800	100		ml24h001.tif	7	641	91.571
	dmso24h001.tif	13	313	24.077		tak4h001.tif	7	166	23.714		ml4h001.tif	8	351	43.875		ml24h001.tif	3	396	132
	dmso24h001.tif	15	474	31.6		tak4h001.tif	8	551	68.875		ml4h001.tif	10	1134	113.4		ml24h001.tif	2	101	50.5
	dmso24h001.tif	14	760	54.286		tak4h001.tif	9	516	57.333		ml4h001.tif	18	756	42		ml24h001.tif	4	454	113.5
	dmso24h001.tif	11	335	30.455		tak4h001.tif	4	270	67.5		ml4h001.tif	10	500	50		ml24h001.tif	6	3356	559.333
	dmso24h001.tif	11	351	31.909		tak4h001.tif	23	349	15.174		ml4h001.tif	9	540	60		ml24h001.tif	2	365	182.5
	dmso24h001.tif	10	726	72.6		tak4h003.tif	10	455	45.5		ml4h001.tif	6	358	59.667		ml24h001.tif	6	536	89.333
	dmso24h001.tif	14	725	51.786		tak4h003.tif	5	155	31		ml4h001.tif	7	368	52.571		ml24h001.tif	4	422	105.5
	dmso24h001.tif	11	859	78.091		tak4h003.tif	14	677	48.357		ml4h001.tif	12	996	83		ml24h001.tif	2	266	133
	dmso24h001.tif	8	480	60		tak4h003.tif	7	453	64.714		ml4h001.tif	9	495	55		ml24h001.tif	3	387	129
	dmso24h001.tif	14	346	24.714		tak4h003.tif	6	538	89.667		ml4h001.tif	5	435	87		ml24h001.tif	3	340	113.333
	dmso24h001.tif	15	321	21.4		tak4h003.tif	9	172	19.111		ml4h001.tif	10	1086	108.6		ml24h001.tif	2	195	97.5
	dmso24h001.tif	11	422	38.364		tak4h003.tif	8	220	27.5		ml4h001.tif	10	421	42.1		ml24h003.tif	4	158	39.5
	dmso24h001.tif	10	784	78.4		tak4h003.tif	20	1319	65.95		ml4h001.tif	9	473	52.556		ml24h003.tif	3	251	83.667
	dmso24h001.tif	10	293	29.3		tak4h003.tif	7	307	43.857		ml4h001.tif	5	418	83.6		ml24h003.tif	2	178	89
	dmso24h001.tif	16	1473	92.062		tak4h003.tif	10	198	19.8		ml4h001.tif	4	291	72.75		ml24h003.tif	5	395	79
	dmso24h001.tif	13	1144	88		tak4h003.tif	5	119	23.8		ml4h001.tif	8	1246	155.75		ml24h003.tif	6	549	91.5
	dmso24h001.tif	15	950	63.333		tak4h003.tif	6	266	44.333		ml4h003.tif	10	303	30.3		ml24h003.tif	3	237	79
	dmso24h001.tif	16	636	39.75		tak4h005.tif	5	470	94		ml4h003.tif	11	618	56.182		ml24h003.tif	3	205	68.333
	dmso24h001.tif	12	546	45.5		tak4h005.tif	9	528	58.667		ml4h003.tif	7	321	45.857		ml24h003.tif	2	139	69.5
	dmso24h001.tif	11	302	27.455		tak4h005.tif	8	370	46.25		ml4h003.tif	9	577	64.111		ml24h003.tif	5	655	131
	dmso24h001.tif	14	1410	100.714		tak4h005.tif	7	339	48.429		ml4h003.tif	8	443	55.375		ml24h005.tif	6	381	63.5
	dmso24h001.tif	15	490	32.667		tak4h005.tif	8	503	62.875		ml4h003.tif	7	699	99.857		ml24h005.tif	2	110	55
	dmso24h001.tif	15	481	32.067		tak4h005.tif	12	605	50.417		ml4h003.tif	7	419	59.857		ml24h005.tif	3	144	48
	dmso24h001.tif	17	356	20.941		tak4h005.tif	8	755	94.375		ml4h003.tif	8	656	82		ml24h005.tif	3	127	42.333
	dmso24h001.tif	10	111	11.1		tak4h005.tif	9	558	62		ml4h003.tif	7	700	100		ml24h005.tif	4	99	24.75
	dmso24h001.tif	9	152	16.889		tak4h005.tif	8	405	50.625		ml4h003.tif	8	1191	148.875		ml24h005.tif	3	230	76.667
	dmso24h001.tif	10	232	23.2		tak4h005.tif	7	443	63.286		ml4h003.tif	5	219	43.8		ml24h005.tif	5	332	66.4
	dmso24h007.tif	12	781	65.083		tak4h005.tif	8	284	35.5		ml4h003.tif	4	405	101.25		ml24h005.tif	4	342	85.5
	dmso24h007.tif	15	1199	79.933		tak4h005.tif	7	332	47.429		ml4h005.tif	12	721	60.083		ml24h005.tif	6	1243	207.167
	dmso24h007.tif	17	926	54.471		tak4h005.tif	13	1294	99.538		ml4h005.tif	15	653	43.533		ml24h005.tif	3	506	168.667
	dmso24h007.tif	15	1032	68.8		mean	9.03125		52.3845		ml4h005.tif	5	215	43		ml24h005.tif	6	291	48.5
	dmso24h007.tif	15	500	33.333		SEM	0.70922		3.91302		ml4h005.tif	8	602	75.25		ml24h005.tif	3	188	62.667
	dmso24h007.tif	10	764	76.4							ml4h005.tif	10	507	50.7		ml24h005.tif	3	263	87.667
	dmso24h007.tif	16	379	23.688					(1 pixel >>> 0.0252 μm2)		ml4h005.tif	7	403	57.571		ml24h005.tif	2	315	157.5
	dmso24h007.tif	17	971	57.118							ml4h005.tif	9	913	101.444		ml24h005.tif	4	107	26.75
	dmso24h007.tif	8	425	53.125							ml4h005.tif	10	915	91.5		ml24h005.tif	2	135	67.5
	mean	12.7368		47.9829							ml4h005.tif	5	251	50.2		ml24h005.tif	3	139	46.333
	SEM	0.445755		3.85225							ml4h005.tif	10	469	46.9		mean	3.66667		99.948
											ml4h005.tif	8	857	107.125		SEM	0.233304		13.8863
				(1 pixel >>> 0.0252 μm2)							mean	8.39024		73.0522
											SEM	0.435999		4.70408					(1 pixel >>> 0.0252 μm2)
														(1 pixel >>> 0.0252 μm2)

## Sheet: Fig. 8(B)
	HEKGFPPML
	Control 24h (1 pixel >>> 0.0252 μm2)					TAK243 4h (1 pixel >>> 0.0252 μm2)					ML792 4h (1 pixel >>> 0.0252 μm2)					ML792 24h (1 pixel >>> 0.0252 μm2)
	Slice	Count	Total Area (Pixel)	Ave Size (Pixel)		Slice	Count	Total Area	Average Size		Slice	Count	Total Area	Average Size		Slice	Count	Total Area	Average Size
	dmso24h007.tif	14	635	45.357		tak4h001.tif	9	453	50.333		ml4h001.tif	8	889	111.125		ml24h001.tif	4	1207	301.75
	dmso24h007.tif	14	398	28.429		tak4h001.tif	9	420	46.667		ml4h001.tif	5	180	36		ml24h001.tif	2	380	190
	dmso24h007.tif	9	404	44.889		tak4h001.tif	6	502	83.667		ml4h001.tif	8	365	45.625		ml24h001.tif	5	484	96.8
	dmso24h007.tif	6	225	37.5		tak4h001.tif	6	391	65.167		ml4h001.tif	6	738	123		ml24h001.tif	3	399	133
	dmso24h007.tif	11	600	54.545		tak4h001.tif	10	351	35.1		ml4h001.tif	7	287	41		ml24h001.tif	6	1413	235.5
	dmso24h007.tif	14	613	43.786		tak4h001.tif	13	422	32.462		ml4h001.tif	8	327	40.875		ml24h001.tif	2	647	323.5
	dmso24h007.tif	11	267	24.273		tak4h001.tif	12	588	49		ml4h001.tif	7	518	74		ml24h001.tif	2	331	165.5
	dmso24h007.tif	8	521	65.125		tak4h001.tif	12	496	41.333		ml4h003.tif	4	216	54		ml24h003.tif	6	1367	227.833
	dmso24h007.tif	8	303	37.875		tak4h001.tif	11	584	53.091		ml4h003.tif	7	410	58.571		ml24h003.tif	2	466	233
	dmso24h007.tif	12	420	35		tak4h001.tif	5	374	74.8		ml4h003.tif	5	516	103.2		ml24h003.tif	2	189	94.5
	dmso24h007.tif	9	247	27.444		tak4h001.tif	15	455	30.333		ml4h003.tif	10	1792	179.2		ml24h003.tif	3	321	107
	dmso24h007.tif	13	543	41.769		tak4h001.tif	12	711	59.25		ml4h003.tif	2	268	134		ml24h003.tif	3	279	93
	dmso24h007.tif	11	378	34.364		tak4h001.tif	9	897	99.667		ml4h003.tif	7	449	64.143		ml24h003.tif	3	284	94.667
	dmso24h007.tif	11	394	35.818		tak4h001.tif	9	828	92		ml4h003.tif	7	453	64.714		ml24h003.tif	5	236	47.2
	dmso24h007.tif	8	254	31.75		tak4h001.tif	7	469	67		ml4h003.tif	8	593	74.125		ml24h005.tif	2	239	119.5
	dmso24h007.tif	5	334	66.8		tak4h001.tif	5	326	65.2		ml4h003.tif	3	413	137.667		ml24h005.tif	2	196	98
	dmso24h007.tif	16	474	29.625		tak4h003.tif	11	422	38.364		ml4h003.tif	4	437	109.25		ml24h005.tif	5	53	10.6
	dmso24h007.tif	10	562	56.2		tak4h003.tif	7	382	54.571		ml4h005.tif	5	102	20.4		ml24h005.tif	2	394	197
	dmso24h007.tif	17	523	30.765		tak4h003.tif	9	419	46.556		ml4h005.tif	4	134	33.5		ml24h005.tif	3	565	188.333
	dmso24h007.tif	10	440	44		tak4h003.tif	8	799	99.875		ml4h005.tif	3	136	45.333		ml24h005.tif	3	78	26
	dmso24h009.tif	13	338	26		tak4h003.tif	12	294	24.5		ml4h005.tif	4	108	27		ml24h005.tif	4	648	162
	dmso24h009.tif	11	941	85.545		tak4h003.tif	7	506	72.286		ml4h005.tif	6	357	59.5		ml24h005.tif	4	508	127
	dmso24h009.tif	5	37	7.4		tak4h003.tif	8	385	48.125		ml4h007.tif	8	751	93.875		ml24h005.tif	4	128	32
	dmso24h009.tif	9	201	22.333		tak4h003.tif	7	222	31.714		ml4h007.tif	7	262	37.429		ml24h005.tif	1	207	207
	dmso24h009.tif	13	241	18.538		tak4h005.tif	14	398	28.429		ml4h007.tif	9	491	54.556		ml24h005.tif	2	741	370.5
	dmso24h009.tif	6	183	30.5		tak4h005.tif	8	992	124		ml4h007.tif	4	155	38.75		ml24h007.tif	3	198	66
	dmso24h009.tif	7	225	32.143		tak4h005.tif	7	399	57		ml4h007.tif	7	680	97.143		ml24h007.tif	4	386	96.5
	dmso24h009.tif	8	237	29.625		tak4h005.tif	11	1076	97.818		ml4h007.tif	7	511	73		ml24h007.tif	3	241	80.333
	dmso24h009.tif	7	181	25.857		tak4h005.tif	5	424	84.8		ml4h007.tif	6	223	37.167		ml24h007.tif	2	333	166.5
	dmso24h009.tif	12	204	17		tak4h005.tif	11	441	40.091		ml4h007.tif	4	152	38		ml24h007.tif	3	166	55.333
	dmso24h009.tif	9	310	34.444		tak4h005.tif	9	188	20.889		ml4h007.tif	8	487	60.875		ml24h007.tif	4	308	77
	dmso24h009.tif	7	209	29.857		tak4h005.tif	5	319	63.8		ml4h007.tif	6	233	38.833		ml24h007.tif	4	235	58.75
	dmso24h009.tif	8	157	19.625		tak4h005.tif	10	301	30.1		ml4h007.tif	5	145	29		ml24h007.tif	2	314	157
	dmso24h009.tif	14	411	29.357		tak4h005.tif	11	528	48		ml4h007.tif	9	810	90		overlay ml24h008.tif	4	391	97.75
	dmso24h009.tif	11	532	48.364		tak4h005.tif	10	308	30.8		ml4h009.tif	5	531	106.2		overlay ml24h008.tif	6	257	42.833
	dmso24h009.tif	10	294	29.4		tak4h005.tif	11	648	58.909		ml4h009.tif	8	442	55.25		overlay ml24h008.tif	2	105	52.5
	dmso24h009.tif	6	233	38.833		mean	9.19444		56.8249		ml4h009.tif	7	102	14.571		overlay ml24h008.tif	4	298	74.5
	dmso24h009.tif	9	429	47.667		SEM	0.439732		4.15607		ml4h009.tif	4	418	104.5		overlay ml24h008.tif	8	373	46.625
	dmso24h009.tif	12	376	31.333							ml4h009.tif	6	311	51.833		overlay ml24h008.tif	2	397	198.5
	dmso24h009.tif	10	218	21.8					(1 pixel >>> 0.0252 μm2)		ml4h009.tif	4	198	49.5		mean	3.35897		132.085
	mean	10.1		36.0234							ml4h009.tif	10	851	85.1		SEM	0.239453		13.6566
	SEM	0.469315		2.34348							mean	6.14634		68.0929
											SEM	0.309526		5.71013					(1 pixel >>> 0.0252 μm2)
				(1 pixel >>> 0.0252 μm2)
														(1 pixel >>> 0.0252 μm2)

## Sheet: S3 Fig
Time (min)	0	1	2	3	4	5	6	7	8	9	10	11	12	13	14	15	16	17	18	19	20
cont 1	2697	3701	4746	5782	6834	7901	9000	10083	11214	12323	13441	14540	15656	16771	17854	18938	20046	21162	22205	23291	24312
cont 2	2829	3892	5001	6099	7204	8320	9469	10622	11805	12948	14097	15228	16364	17474	18585	19652	20759	21850	22914	23958	24960
cont 4	2117	2974	3834	4704	5580	6460	7344	8234	9124	9997	10905	11778	12664	13525	14401	15291	16135	17006	17841	18658	19454
cont ave	2547.67	3522.33	4527	5528.33	6539.33	7560.33	8604.33	9646.33	10714.3	11756	12814.3	13848.7	14894.7	15923.3	16946.7	17960.3	18980	20006	20986.7	21969	22908.7
cont SEM	218.679	279.656	354.233	422.203	491.415	563.306	644.546	723.105	813.263	897.815	973.268	1054.21	1133.9	1216.22	1290.21	1350.49	1437.31	1513.09	1586.09	1666.66	1737.43
1 μM Epox 1	1207	1626	2026	2402	2746	3078	3398	3707	4004	4282	4530	4765	4988	5198	5374	5547	5723	5880	6036	6169	6292
1 μM Epox 2	1269	1698	2092	2460	2795	3119	3423	3700	3940	4173	4368	4541	4700	4848	4984	5102	5213	5320	5419	5506	5576
1 μM Epox 4	527	742	936	1117	1291	1458	1610	1754	1891	2022	2146	2260	2365	2462	2552	2643	2728	2806	2879	2943	3002
1Epox ave	1001	1355.33	1684.67	1993	2277.33	2551.67	2810.33	3053.67	3278.33	3492.33	3681.33	3855.33	4017.67	4169.33	4303.33	4430.67	4554.67	4668.67	4778	4872.67	4956.67
1Epox SEM	237.675	307.37	374.818	438.32	493.369	546.961	600.21	649.836	693.913	735.84	769.09	800.283	830.505	859.625	882.874	903.017	925.123	945.259	966.061	983.633	998.95
5 μM Epox 1	185	244	290	323	353	379	402	422	440	457	471	483	495	505	514	521	528	538	544	551	556
5 μM Epox 2	114	143	160	175	183	191	196	203	208	210	214	216	221	222	226	227	229	232	235	237	236
5 μM Epox 4	81	119	141	164	186	206	225	238	252	266	278	290	298	311	320	329	339	348	355	363	370
5Epox Ave	126.667	168.667	197	220.667	240.667	258.667	274.333	287.667	300	311	321	329.667	338	346	353.333	359	365.333	372.667	378	383.667	387.333
5Epox SEM	30.683	38.2985	46.8224	51.2651	56.1733	60.3223	64.3799	67.9223	71.143	74.7685	77.242	79.5871	81.5864	83.5484	84.7926	86.1858	87.3123	89.1914	89.9389	91.2311	92.7817
As 1	3084	4208	5320	6413	7534	8621	9725	10819	11875	12897	13898	14852	15830	16746	17636	18490	19383	20213	21072	21877	22655
As 2	2369	3116	3812	4450	5071	5675	6236	6744	7180	7560	7890	8158	8424	8649	8875	9055	9264	9458	9623	9793	9930
As 4	1431	2049	2646	3251	3853	4459	5072	5673	6292	6887	7506	8082	8679	9258	9828	10405	10972	11538	12108	12625	13141
As ave	2294.67	3124.33	3926	4704.67	5486	6251.67	7011	7745.33	8449	9114.67	9764.67	10364	10977.7	11551	12113	12650	13206.3	13736.3	14267.7	14765	15242
As SEM	478.625	623.264	774.019	921.629	1082.68	1235.58	1397.98	1567.62	1732.07	1901.12	2069.64	2244.11	2427.28	2603.44	2775.17	2945.89	3127.44	3293.53	3476.97	3648.77	3820.65
Sb 1	3231	4360	5446	6521	7578	8662	9713	10729	11725	12676	13576	14393	15207	15958	16660	17321	18000	18635	19257	19844	20390
Sb 2	2922	3925	4875	5802	6717	7649	8556	9431	10219	10952	11607	12204	12751	13260	13718	14149	14600	15018	15406	15793	16129
Sb 4	1525	2184	2838	3496	4157	4822	5505	6163	6836	7508	8165	8843	9477	10133	10776	11425	12091	12698	13328	13951	14498
Sb ave	2559.33	3489.67	4386.33	5273	6150.67	7044.33	7924.67	8774.33	9593.33	10378.7	11116	11813.3	12478.3	13117	13718	14298.3	14897	15450.3	15997	16529.3	17005.7
Sb SEM	524.803	664.801	791.52	912.421	1027.35	1149	1255.09	1358.37	1445.59	1519.17	1581.2	1614.01	1659.72	1683.05	1698.56	1703.67	1712.23	1727.44	1736.88	1740.55	1756.45
Bi 1	1336	1807	2246	2695	3128	3553	3977	4387	4781	5148	5493	5823	6144	6461	6758	7038	7334	7599	7868	8125	8376
Bi 2	1404	1886	2323	2764	3176	3597	4002	4381	4750	5092	5425	5712	5992	6254	6489	6723	6944	7169	7373	7575	7750
Bi 4	720	1046	1343	1643	1940	2237	2520	2814	3086	3366	3627	3890	4155	4407	4657	4898	5143	5386	5607	5816	6006
Bi ave	1153.33	1579.67	1970.67	2367.33	2748	3129	3499.67	3860.67	4205.67	4535.33	4848.33	5141.67	5430.33	5707.33	5968	6219.67	6473.67	6718	6949.33	7172	7377.33
Bi SEM	217.554	267.806	314.62	362.714	404.238	446.181	489.886	523.336	559.905	584.89	610.982	626.653	639.175	652.907	660.084	667.06	674.791	677.469	686.209	696.342	709.08
Cd 1	2616	3567	4470	5344	6176	6952	7688	8378	9049	9692	10294	10881	11418	11952	12464	12930	13406	13867	14272	14667	15036
Cd 2	2540	3492	4429	5378	6307	7250	8195	9108	10031	10957	11827	12673	13559	14391	15233	16020	16824	17582	18368	19085	19823
Cd 3	1595	2303	2992	3693	4390	5092	5808	6522	7210	7928	8599	9301	10034	10728	11415	12135	12813	13493	14192	14820	15430
Cd ave	2250.33	3120.67	3963.67	4805	5624.33	6431.33	7230.33	8002.67	8763.33	9525.67	10240	10951.7	11670.3	12357	13037.3	13695	14347.7	14980.7	15610.7	16190.7	16763
Cd SEM	328.4	409.406	485.977	556.087	618.324	675.169	726.071	769.741	826.784	878.343	932.234	974.054	1025.37	1076.63	1138.83	1184.94	1249.94	1305.14	1378.86	1447.84	1534.22

## Sheet:  S5 Fig
S6 Fig. (A)
	Blank corrected raw data (A450) Absorbance
	DMSO2h	DMSO4h	DMSO8h	DMSO15h	TAK2h	TAK4h	TAK8h	TAK15h
A	0.556	0.58	0.524	0.452	0.531	0.566	0.464	0.395
B	0.62	0.585	0.537	0.503	0.583	0.568	0.528	0.391
C	0.624	0.553	0.562	0.483	0.618	0.552	0.571	0.423
D	0.618	0.631	0.602	0.488	0.636	0.611	0.579	0.439
E	0.575	0.71	0.645	0.436	0.671	0.635	0.604	0.431
S5 Fig. (B)
	Blank corrected raw data (A450) Absorbance
	0.1% DMSO pre-exposure				ML792 20 μM pre-exposure
TAK243 (μM)	0	2.5	5	10	0	2.5	5	10
A	0.331	0.088	0.008	0.025	0.249	0.17	0.187	0.157
B	0.297	0.047	0.014	0.035	0.235	0.156	0.173	0.106
C	0.306	0.057	0.032	0.039	0.237	0.168	0.172	0.118
D	0.307	0.09	0.029	0.017	0.231	0.17	0.125	0.117
E	0.311	0.047	0.005	0.018	0.23	0.176	0.127	0.072
	Cell viability (% of control)
	0.1% DMSO pre-exposure				ML792 20 μM pre-exposure
TAK243 (μM)	0	2.5	5	10	0	2.5	5	10
A	106.637	28.3505	2.57732	8.05412	80.2191	54.768	60.2448	50.5799
B	95.683	15.1418	4.51031	11.2758	75.7088	50.2577	55.7345	34.1495
C	98.5825	18.3634	10.3093	12.5644	76.3531	54.1237	55.4124	38.0155
D	98.9046	28.9948	9.34278	5.4768	74.4201	54.768	40.2706	37.6933
E	100.193	15.1418	1.61082	5.79897	74.0979	56.701	40.9149	23.1959
Ave	100	21.1985	5.6701	8.63402	76.1598	54.1237	50.5155	36.7268
SEM	1.81559	3.10918	1.76633	1.42774	1.09536	1.05874	4.14129	4.3831
